# Supplementary material for: Novel Dual PI3K/mTOR Inhibitor, Apitolisib (GDC-0980), Inhibits Growth and Induces Apoptosis in Human Glioblastoma Cells
Source: MDPI journal article supplement (doi:10.3390/ijms222111511), 2021-10-26
Supplement: s1 [file s1]

# Supplementary Materials

**Table S1.** The ratio between the means of densitometric values of P-EIF2 $\alpha$  /total EIF2 $\alpha$ .

| A172     |            |            | U118     |            |            |                                      |
|----------|------------|------------|----------|------------|------------|--------------------------------------|
| Control  | 10 $\mu$ M | 20 $\mu$ M | Control  | 10 $\mu$ M | 20 $\mu$ M |                                      |
| 0.187590 | 0.229013   | 0.302291   | 0.703806 | 0.555065   | 0.818986   | EIF 2 $\alpha$                       |
| 0.252652 | 0.288993   | 0.305706   | 0.562119 | 0.380853   | 0.213949   | P-EIF 2 $\alpha$                     |
| 1.343    | 1.262      | 1.011      | 0.799    | 0.686      | 0.261      | P-EIF 2 $\alpha$ /<br>EIF 2 $\alpha$ |
